# Supplementary material for: Non-invasive Raman spectroscopy for monitoring metabolite changes in tomato plants infected by phytoplasma
Source: Royal Society of Chemistry journal article supplement (doi:10.1039/d5ay00293a), 2025-01-01
Supplement: d5ay00293a1.pdf [file d5ay00293a1.pdf]

## Non-invasive Raman spectroscopy for monitoring metabolite changes in tomato plants infected by phytoplasma

Lorenzo Pandolfi <sup>a,†</sup>, Niccolò Miotti <sup>b,†</sup>, Guido Faglia <sup>c</sup>, Carlo Pennacchio <sup>a</sup>, Andrea Ponzoni <sup>a</sup>, Marina Ciuffo <sup>b</sup>, Sabrina Palmano <sup>b</sup>, Martino Schillaci <sup>b</sup>, Emanuela Gobbi <sup>d</sup>, Massimo Turina <sup>b</sup>,  
Camilla Baratto <sup>a\*</sup>

<sup>a</sup> National Research Council - National Institute of Optics (CNR-INO), Via Branze 45, 25123 Brescia, Italy

<sup>b</sup> National Research Council - Institute for Sustainable Plant Protection (CNR-IPSP), Strada delle Cacce 73, 10135 Turin, Italy

<sup>c</sup> Department of Information Engineering - University of Brescia, Via Branze 38, 25123 Brescia, Italy

<sup>d</sup> Department of Molecular and Translational Medicine - University of Brescia, Viale Europa 11, 25123 Brescia, Italy

<sup>†</sup> These authors contributed equally to this work.

The Variable Importance Plot (VIP) displays the most relevant peaks for the discrimination. Very few vibrational frequencies were above the threshold (0.8), such as  $\nu_1 = 1005 \text{ cm}^{-1}$ ,  $\nu_2 = 1155 \text{ cm}^{-1}$ ,  $\nu_3 = 1326 \text{ cm}^{-1}$ ,  $\nu_4 = 1525 \text{ cm}^{-1}$  and  $\nu_5 = 1604 \text{ cm}^{-1}$ . The latter has been associated with lignin and polyphenol content. Meanwhile,  $\nu_1$ ,  $\nu_2$  and  $\nu_4$  are vibrational modes of the same reference spectrum (*i.e.*, carotenoid content), and they can be considered related. Accordingly, only  $\nu_4$  – the mode with the highest VIP value – was selected. In addition to that, we opted for the use of  $\nu_3$  ( $1326 \text{ cm}^{-1}$ ), typically associated with chlorophyll content. These vibrations have been selected since they also guarantee no overlap between spectral features of different chemical families.

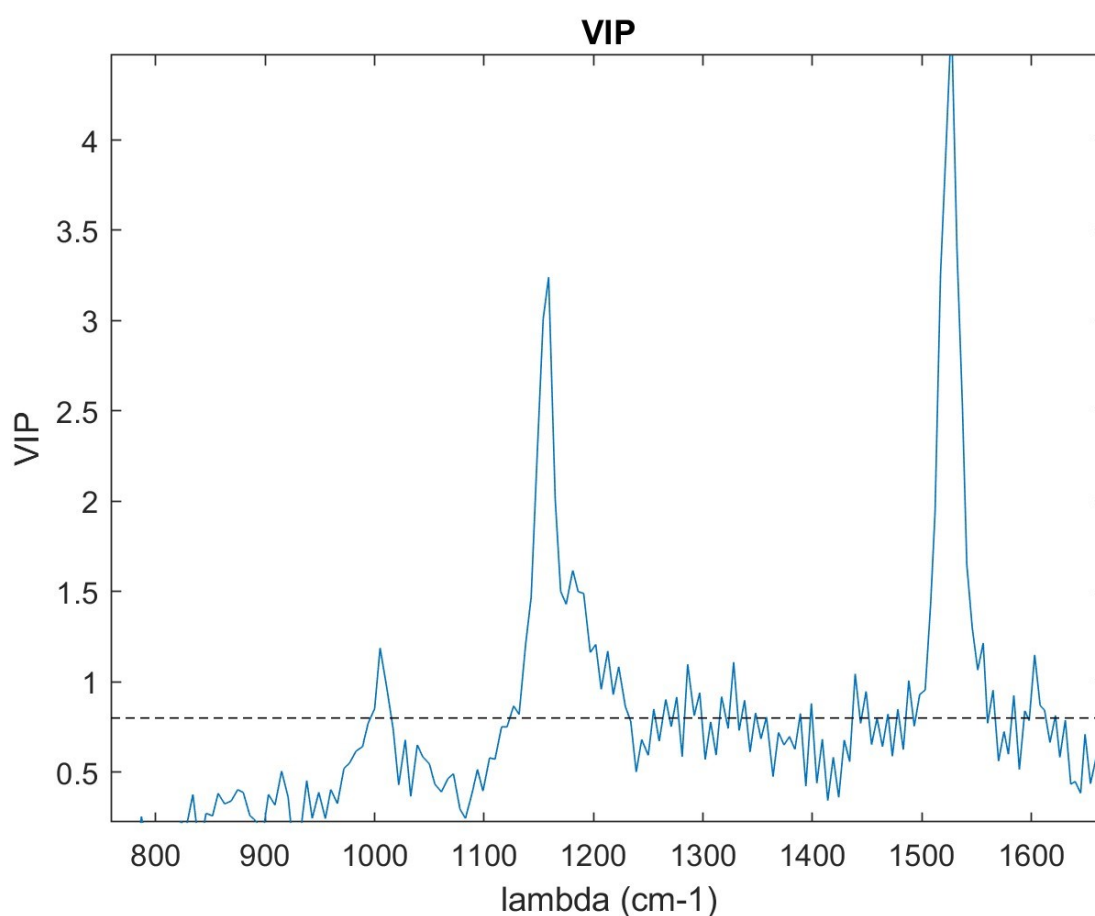

**Figure S1** Variable  $\lambda$  Importance in the Projection statistic for the Partial Least Squares (PLS) model applied to the data.

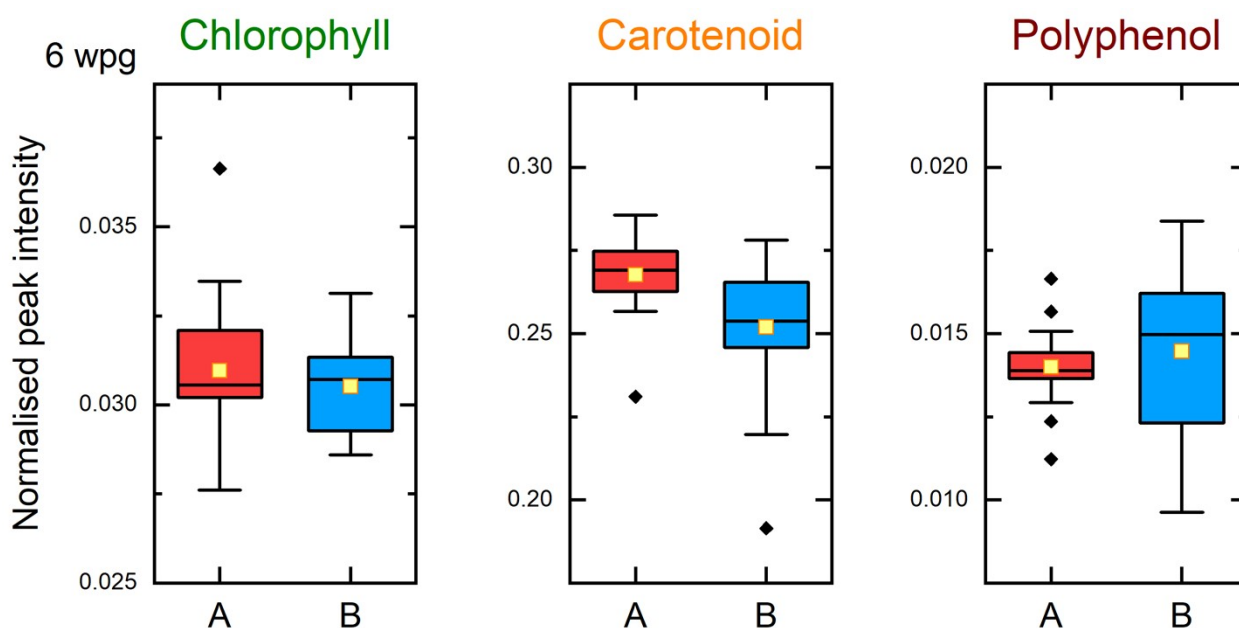

**Figure S2** Box-plot of the intensities of  $v_1$  (chlorophyll),  $v_2$  (carotenoid) and  $v_3$  (polyphenol) from group A (infected plants) and group B (control plants). Plants have been grafted for six weeks (6 wpg). Mean values are depicted by a yellow square, while the median is denoted by a straight line. Black diamonds are outliers.

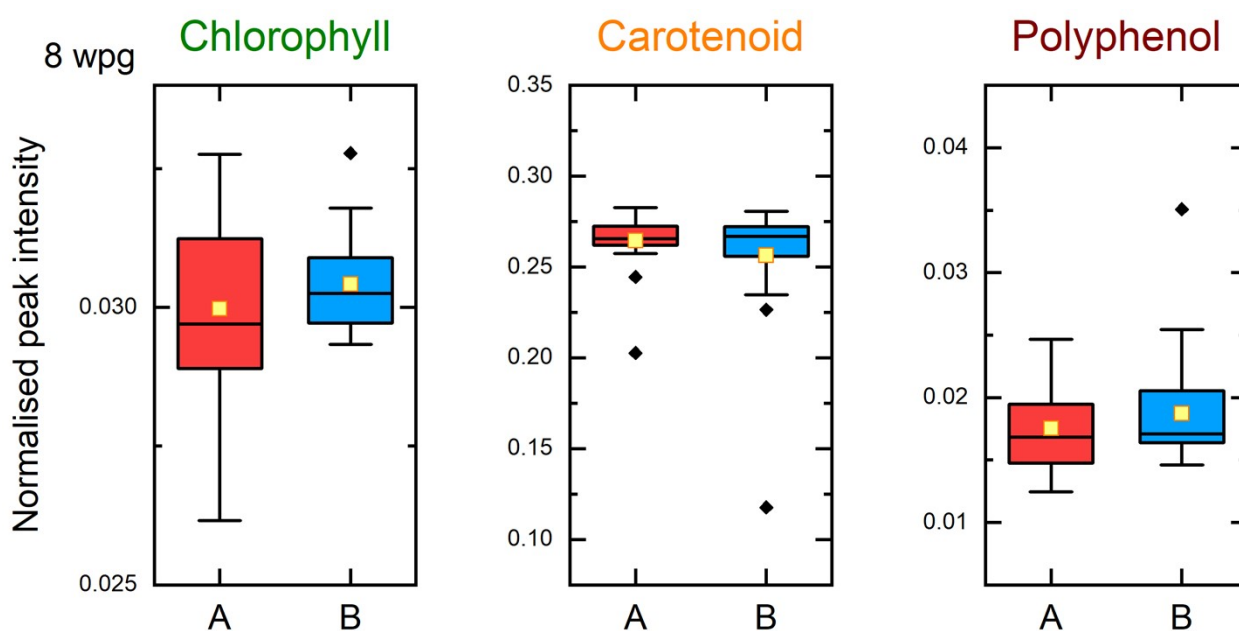

**Figure S3** Box-plot of the intensities of  $v_1$  (chlorophyll),  $v_2$  (carotenoid) and  $v_3$  (polyphenol) from group A (infected plants) and group B (control plants). Plants have been grafted for eight weeks (8 wpg). Mean values are depicted by a yellow square, while the median is denoted by a straight line. Black diamonds are outliers.

**Table S1** One-way ANOVA results used to test the effect of the categorical independent variable “time” on the GU/ng.

|           | Df | Sum Sq | Mean Sq  | F value | Pr(>F) |
|-----------|----|--------|----------|---------|--------|
| Time      | 2  | 2.12E8 | 1.06E8   | 2.809   | 0.138  |
| Residuals | 6  | 2.27E8 | 37774811 |         |        |

**Table S2** Results of ribosomal RNA detection through one-step RT-qPCR: for each group (2 wpg, 4 wpg, 6 wpg, and 8 wpg), one leaflet from three different infected grafted plants was sampled. Each sample was analyzed in duplicate, and the average Ct (cycle threshold) values are presented.

| Sample | Ct average |
|--------|------------|
| 2 wpg  | undetected |
| 2 wpg  | undetected |
| 2 wpg  | undetected |
| 4 wpg  | 28.0901    |
| 4 wpg  | 29.6951    |
| 4 wpg  | 29.5763    |
| 6 wpg  | 25.7669    |
| 6 wpg  | 25.4102    |
| 6 wpg  | 26.0058    |
| 8 wpg  | 22.3832    |
| 8 wpg  | 25.3874    |
| 8 wpg  | 22.9493    |

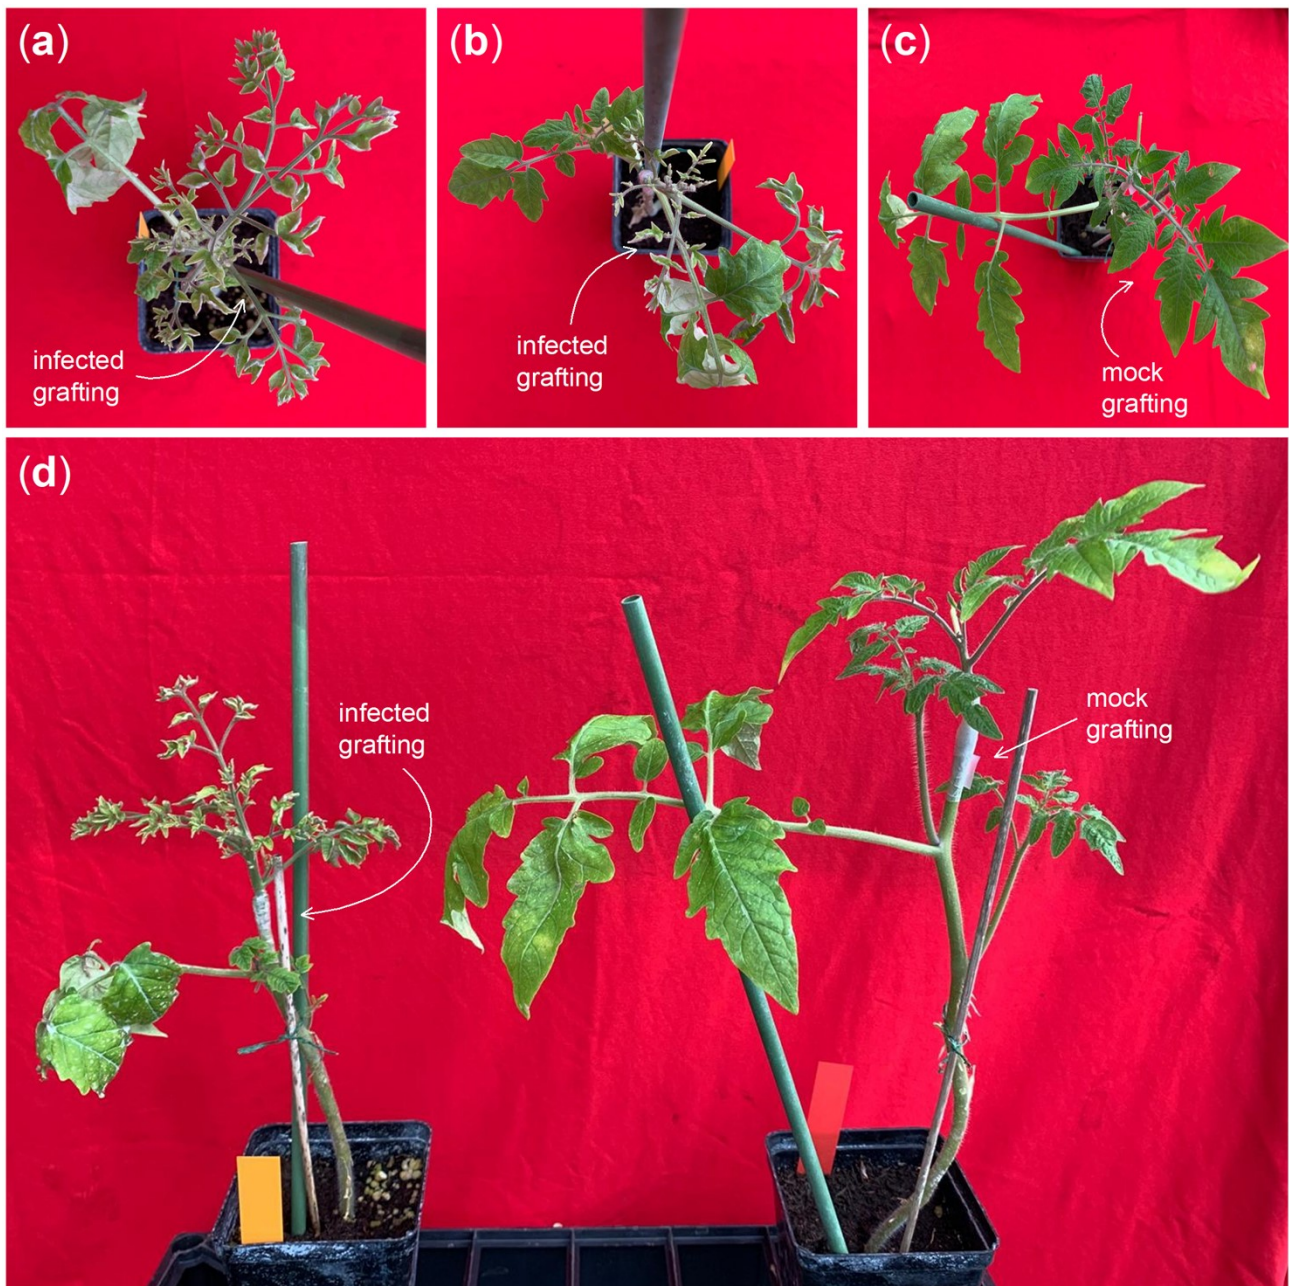

**Figure S4** (a) top-view of a grafted tomato plant with infected material; (b) top-view of a grafted tomato plant with infected material and asymptomatic new shoots; (c) top-view of a mock-grafted tomato plant with healthy material; (d) side-view of infected and mock-grafted tomato plants. Symptoms caused by *Ca. P. solani* in tomato are visible in infected-grafted plants, characterized by reduced growth, upward leaf curling and reddish veins. The development of new shoots following grafting remains asymptomatic until the fourth week, after which symptoms become visible and recognizable.
